# Supplementary material
Source: publisher site journal article supplement (https://www.dovepress.com/article/531973)
Supplement: Supplementary file 1 [file 531973%20Supplementary%20Materials.docx]

**Supplemental Table A. Antimicrobial susceptibilities of 54 Carbapenem-Resistant *P. aeruginosa* isolates (mg/L)**

| **Sample No.** | **MLST** | **IMP** | **MEM** | **AZM** | **CIP** | **LEV** | **CAZ** | **FEP** | **GM** | **AKM** | **TZP** | **CZA** | **PB** |
| --- | --- | --- | --- | --- | --- | --- | --- | --- | --- | --- | --- | --- | --- |
| 2 | 463 | 256 | ＞256 | 256 | 32 | 128 | 64 | ＞256 | 4 | 8 | ＞256/4 | 4/4 | ＜0.1 |
| 11 | 231 | 64 | 32 | 128 | 1 | 4 | 8 | 8 | 4 | 4 | 16/4 | 4/4 | ＜0.1 |
| 22 | 712 | 256 | ＞256 | 128 | 16 | 4 | 16 | ＞256 | 8 | 8 | 256/4 | 128/4 | ＜0.1 |
| 47 | 712 | 256 | ＞256 | 128 | 16 | 32 | 16 | ＞256 | 8 | 8 | 256/4 | 128/4 | ＜0.1 |
| 121 | 1743 | 32 | 64 | 128 | 1 | 4 | 32 | ＞256 | 8 | 8 | ＞256/4 | 16/4 | ＜0.1 |
| 156 | 463 | 256 | ＞256 | 256 | 32 | 128 | 64 | ＞256 | 128 | 8 | ＞256/4 | 128/4 | ＜0.1 |
| 159 | unknown | 256 | ＞256 | 256 | 32 | 32 | 32 | ＞256 | 4 | 4 | ＞256/4 | 4/4 | ＜0.1 |
| 162 | 275 | 256 | ＞256 | 128 | ＞64 | ＞128 | 64 | ＞256 | ＞256 | ＞64 | ＞256/4 | 256/4 | ＜0.1 |
| 187 | 270 | 64 | 128 | 256 | 32 | 64 | 128 | ＞256 | ＞256 | 2 | 256/4 | 256/4 | ＜0.1 |
| 192 | 275 | 256 | 128 | 256 | 32 | 64 | 64 | ＞256 | ＞256 | 128 | ＞256/4 | 256/4 | ＜0.1 |
| 216 | 671 | 32 | 8 | 64 | 0.25 | 0.5 | 32 | 16 | 4 | 4 | 64/4 | 2/4 | ＜0.1 |
| 283 | 1290 | 8 | 64 | 64 | 1 | 2 | 8 | 16 | 32 | 1 | 128/4 | 4/4 | ＜0.1 |
| 307 | Unknown | 16 | 4 | 16 | 0.25 | 2 | 32 | 1 | 4 | 2 | ＞256/4 | 1/4 | ＜0.1 |
| 312 | 640 | 8 | 8 | 128 | 4 | 16 | 32 | 8 | 8 | 16 | 32/4 | 4/4 | 0.25 |
| 345 | 2100 | 32 | 16 | 64 | 0.25 | 0.5 | 16 | 16 | 4 | 8 | 128/4 | 2/4 | ＜0.1 |
| 526 | 1026 | 64 | 8 | 16 | 0.1 | ＜0.1 | 4 | 4 | 8 | 8 | 8/4 | 4/4 | ＜0.1 |
| 537 | 1632 | 32 | 8 | 32 | 0.25 | 1 | 4 | 2 | 4 | 8 | 32/4 | 4/4 | ＜0.1 |
| 545 | 671 | 64 | 8 | 64 | 0.25 | 0.25 | 32 | 32 | 8 | 16 | 128/4 | 2/4 | ＜0.1 |
| 604 | 235 | 8 | 32 | 64 | 16 | 64 | 128 | 256 | 128 | ＞64 | 256/4 | 64/4 | 1 |
| 614 | 463 | 256 | 256 | 128 | 16 | 64 | 128 | 256 | 4 | 4 | 256/4 | 16/4 | 1 |
| 666 | 1422 | 128 | 128 | 128 | 16 | 8 | 64 | 64 | 16 | ＞64 | 128/4 | 64/4 | 1 |
| 693 | 2475 | 32 | 4 | 8 | 0.25 | 0.5 | 4 | 4 | 2 | 4 | 8/4 | 2/4 | 1 |
| 694 | 1076 | 256 | 256 | 128 | 2 | 2 | 64 | 256 | 8 | 8 | 256/4 | 4/4 | 1 |
| 698 | 463 | 256 | 256 | 64 | 16 | 16 | 16 | 128 | 4 | 4 | 64/4 | 1/4 | 0.25 |
| 708 | 242 | 8 | 4 | 4 | 0.25 | 0.25 | 1 | 4 | 4 | 4 | 4/4 | 1/4 | 0.5 |
| 729 | 244 | 256 | 128 | 128 | 16 | 1 | 128 | 64 | 32 | ＞64 | 256/4 | 128/4 | 1 |
| 958 | 1125 | 32 | 32 | 32 | 16 | 8 | 16 | 32 | 4 | 4 | 32/4 | 16/4 | 0.5 |
| A1 | 508 | 16 | 64 | 128 | 4 | 16 | 32 | 32 | 8 | 8 | 64/4 | 8/4 | 1 |
| A3 | 463 | 256 | ＞256 | ＞256 | 32 | 32 | ＞256 | ＞256 | 32 | 4 | ＞256/4 | ＞256/4 | 0.25 |
| A6 | 463 | 256 | ＞256 | ＞256 | 32 | 32 | ＞256 | ＞256 | 128 | 4 | ＞256/4 | ＞256/4 | 0.25 |
| B1 | 244 | 32 | 32 | 32 | 0.025 | 0.25 | 128 | 16 | 64 | 8 | 32/4 | 64/4 | 0.5 |
| B3 | 508 | 16 | 64 | 128 | 4 | 8 | 32 | 32 | 8 | 16 | 256/4 | 8/4 | 1 |
| B4 | 463 | 256 | ＞256 | ＞256 | 64 | 64 | 64 | ＞256 | 4 | 4 | ＞256/4 | 8/4 | 0.25 |
| B5 | 463 | 256 | ＞256 | ＞256 | 64 | 64 | 64 | ＞256 | 4 | 4 | ＞256/4 | 8/4 | 0.25 |
| C1 | 235 | 8 | 8 | 8 | 16 | 32 | 128 | 64 | ＞256 | 64 | 128/4 | 16/4 | ＜0.1 |
| C2 | 3137 | 32 | 8 | 16 | 0.25 | 0.5 | 32 | 16 | 2 | 2 | 64/4 | 2/4 | 0.25 |
| C6 | 155 | 32 | 8 | 8 | 0.025 | 0.25 | 64 | 32 | 32 | 8 | 64/4 | 128/4 | ＜0.1 |
| D3 | 463 | 256 | ＞256 | ＞256 | 64 | 64 | 128 | ＞256 | 4 | 4 | ＞256/4 | 8/4 | 0.25 |
| D6 | 463 | 256 | ＞256 | ＞256 | 64 | 64 | 128 | ＞256 | 4 | 4 | ＞256/4 | 8/4 | ＜0.1 |
| E1 | 231 | 16 | 16 | 16 | 0.25 | 1 | 4 | 8 | 4 | 4 | 16/4 | 4/4 | ＜0.1 |
| E2 | 639 | 8 | 0.5 | 1 | 0.025 | 0.01 | 2 | 2 | 8 | 16 | 0.5/4 | 1/4 | ＜0.1 |
| E3 | 231 | 8 | 16 | 8 | 0.5 | 1 | 4 | 8 | 4 | 4 | 16/4 | 4/4 | ＜0.1 |
| E4 | 231 | 16 | 16 | 16 | 0.5 | 1 | 4 | 8 | 4 | 4 | 16/4 | 4/4 | ＜0.1 |
| F1 | 2100 | 16 | 16 | 16 | 0.025 | 0.5 | 32 | 16 | 4 | 4 | 128/4 | 2/4 | ＜0.1 |
| F2 | 381 | 8 | 0.05 | 0.5 | 0.025 | 0.5 | 0.5 | 2 | 2 | 2 | 1/4 | 0.5/4 | ＜0.1 |
| F3 | 231 | 16 | 16 | 16 | 0.25 | 1 | 4 | 8 | 4 | 4 | 16/4 | 4/4 | ＜0.1 |
| F6 | 463 | 256 | ＞256 | ＞256 | 64 | 64 | 64 | ＞256 | 2 | 4 | ＞256/4 | 16/4 | 0.25 |
| G3 | unknown | 16 | 64 | 64 | 1 | 2 | 32 | 64 | 4 | 4 | 32/4 | 16/4 | 0.25 |
| G4 | 244 | 16 | 16 | ＞256 | 0.25 | 1 | 256 | 128 | 8 | 32 | ＞256/4 | 64/4 | ＞64 |
| H1 | 463 | 256 | ＞256 | ＞256 | 64 | 64 | 128 | ＞256 | 4 | 4 | ＞256/4 | 8/4 | 0.5 |
| H3 | 606 | 32 | 32 | 2 | 0.025 | 0.01 | ＞256 | ＞256 | 4 | 16 | 8/4 | ＞256/4 | ＜0.1 |
| H4 | 1125 | 16 | 32 | 32 | 4 | 8 | 8 | 16 | 4 | 4 | 32/4 | 8/4 | 0.25 |
| H5 | 463 | 256 | ＞256 | ＞256 | 64 | 64 | 128 | ＞256 | 4 | 4 | ＞256/4 | 16/4 | 0.5 |
| I1 | 244 | 64 | 32 | 4 | 0.025 | 0.01 | 32 | 32 | 16 | 32 | 128/4 | 128/4 | 0.25 |

Abbreviations: AZM, azithromycin; CIP, ciprofloxacin; LEV, levofloxacin; CAZ, ceftazidime; FEP, cefepime; GM, gentamicin; AKM, amikacin; TZP, piperacillin-tazobactam; CZA, ceftazidime/avibactam; PB, polymyxin B

**Supplemental Table B. The clinical information on the isolates collected from patients and ventilator condensate**

|  | **Patients’ information** | | | | **Related strain information** | | | |
| --- | --- | --- | --- | --- | --- | --- | --- | --- |
| **Patient no.** | **Clinical diagnosis** | **Invasive procedure(s)** | **CSPA in sputum samples during hospitalization（Yes or No）and the time of first culture positive** | **Outcome** | **Sample No.** | **Infection or colonization（I/C）** | **Acquisition time** | **Sample source** |
| P1 | Multiple injuries, subarachnoid hemorrhage, hemorrhagic shock | splenectomy, abdominal wall repair, endotracheal intubation | Yes 2020.10.05 | live | C1 | C | 2020.09.14 | ventilator condensate |
| No | / | / | / | / | B3 | C | 2020.10.01 | ventilator condensate |
| P2 | Urinary tract infection, pulmonary infection, septic shock | endotracheal intubation, CRRT | No | live | C2 | C | 2020.10.14 | ventilator condensate |
| P3 | Chronic obstructive pulmonary disease with acute exacerbation, severe pneumonia | lung transplantation, CRRT, tracheostomy | Yes 2020.10.28 | death | D5 | C | 2020.11.17 | ventilator condensate |
| P4 | Severe pneumonia, septic shock | endotracheal intubation | Yes 2021.01.18 | death | E2 | C | 2021.02.22 | ventilator condensate |
| P5 | Severe pneumonia, septic shock | endotracheal intubation, ECMO treatment | Yes 2021.01.05 | death | E3 | C | 2021.02.22 | ventilator condensate |
| P6 | Alcoholic cirrhosis, renal allograft dysfunction, chronic liver failure, acute heart failure, pulmonary infection | liver and kidney transplantation, tracheostomy | No | death | JYPA11 | I | 2021.01.15 | sputum |
| E1 | C | 2021.02.22 | ventilator condensate |
| E4 | 2021.03.17 |
| F3 | 2021.04.14 |
| P7 | Cerebral hemorrhage, pulmonary infection | removal of intracranial hematoma, tracheostomy | Yes 2021.04.25 | death | G4 | C | 2021.05.12 | ventilator condensate |
| P8 | pulmonary infection, cardiac insufficiency,  urinary tract infection | tracheostomy | No | live | JYPA958 | I | 2021.7.12 | sputum |
| H4 | C | 2021.07.12 | ventilator condensate |
| P9 | Idiopathic pulmonary interstitial fibrosis, severe pulmonary hypertension, atrial fibrillation | ECMO treatment, tracheostomy | No | live | JYPA729 | I | 2021.07.07 | sputum |
| I1 | C | 2021.07.12 | ventilator condensate |
| P10 | Cerebral hemorrhage, pulmonary infection | removal of intracranial hematoma, tracheostomy | No | live | JYPA345 | I | 2021.04.07 | sputum |
| F1 | C | 2021.04.12 | ventilator condensate |
| P11 | Hepatitis B cirrhosis decompensated, pulmonary infection, abdominal infection | / | No | live | JYPA2 | I | 2021.01.06 | sputum |
| P12 | Severe pneumonia, septic shock, liver and kidney insufficiency | tracheostomy | No | live | JYPA22 | I | 2021.01.19 | sputum |
| P13 | Acute liver failure,  gastrointestinal bleeding, pulmonary infection | liver transplantation | No | live | JYPA47 | I | 2021.01.25 | bile |
| P14 | brain tumor | excision of deep supratentorial lesions | No | live | JYPA121 | C | 2021.02.19 | sputum |
| P15 | Organic phosphorus poisoning, acute respiratory failure, toxic encephalopathy, pneumonia | endotracheal intubation | No | live | JYPA156 | I | 2021.02.25 | urine |
| P16 | Septic shock,  cerebral hemorrhage, cerebral hernia | endotracheal intubation | No | live | JYPA159 | I | 2021.02.24 | blood |
| P17 | Chronic liver failure, duodenal perforation,  abdominal infection, pneumonia | tracheostomy,  abdominal puncture drainage, percutaneous gastrostomy | No | death | JYPA216 | I | 2021.02.27 | blood |
| JYPA187 | 2021.03.05 | ascites |
| JYPA192 | 2021.03.04 | urine |
| P18 | Severe infection, urinary tract infection,  septic shock | endotracheal intubation | No | death | JYPA216 | I | 2021.03.09 | sputum |
| P19 | Thoracic aortic aneurysm, pulmonary infection, gastrointestinal bleeding | tracheostomy, pleural puncture catheter drainage, resection of descending aortic arch aneurysm and artificial vessel replacement | No | live | JYPA283 | I | 2021.03.17 | incision secretion |
| P20 | Arteriosclerosis obliterans of lower limbs,  septic shock, pneumonia | endotracheal intubation, left superficial femoral artery balloon dilatation and stent implantation | No | death | JYPA307 | I | 2021.03.24 | sputum |
| P21 | Decompensated cirrhosis, hepatic encephalopathy, shock, respiratory failure | liver transplantation, tracheostomy | No | live | JYPA312 | I | 2021.03.26 | blood |
| P22 | Decompensated cirrhosis, septic shock | drainage of scrotal abscess | No | live | JYPA526 | C | 2021.06.02 | sputum |
| P23 | Pulmonary infection,  skin sinus | / | No | death | JYPA537 | I | 2021.06.05 | sputum |
| P24 | Interstitial lung disease, pulmonary infection | lung transplantation, tracheostomy | No | live | JYPA545 | I | 2021.06.07 | sputum |
| P25 | Septic shock, Severe pneumonia | lung transplantation, CRRT, pleural puncture catheter drainage, pericardial fenestration | No | death | JYPA604 | I | 2021.06.27 | pleural fluid |
| P26 | Rheumatic heart disease,  pulmonary infection | double valve replacement, tricuspid valvuloplasty | No | live | JYPA614 | I | 2021.06.21 | urine |
| P27 | Abdominal infection, interstitial pneumonia, biliary tract infection | cholecystectomy, endotracheal intubation | No | live | JYPA666 | I | 2021.06.24 | bile |
| P28 | Malignant tumor of colon, liver metastasis, abdominal infection, pulmonary infection | radical resection of right colon cancer and hepatectomy | No | death | JYPA693 | I | 2020.12.18 | blood |
| P29 | Severe pneumonia | tracheostomy | No | live | JYPA694 | I | 2020.12.18 | sputum |
| P30 | Septic shock, severe pneumonia | CRRT, tracheostomy | No | death | JYPA698 | I | 2020.12.18 | sputum |
| P31 | Bronchiectasis with infection, lower gastrointestinal bleeding, urinary tract infection | Tracheostomy, pleural puncture drainage | No | live | JYPA708 | I | 2020.12.28 | sputum |

Abbreviations: CRRT, Continuous Renal Replacement Therapy; ECMO, Extracorporeal Membrane Oxygenation; I, Infection; C, Colonization

**Supplemental Table C. Genome Accession Information.**

| Sample Name | BioSample Accession | Genome Accession |
| --- | --- | --- |
| PA-A1 | SAMN46080943 | JBKILN000000000 |
| PA-A3 | SAMN46080944 | JBKILO000000000 |
| PA-A6 | SAMN46080945 | JBKILP000000000 |
| PA-B1 | SAMN46080946 | JBKILQ000000000 |
| PA-B3 | SAMN46080947 | JBKILR000000000 |
| PA-B4 | SAMN46080948 | JBKILS000000000 |
| PA-B5 | SAMN46080949 | JBKILT000000000 |
| PA-C1 | SAMN46080950 | JBKILU000000000 |
| PA-C2 | SAMN46080951 | JBKILV000000000 |
| PA-C6 | SAMN46080952 | JBKILW000000000 |
| PA-D3 | SAMN46080953 | JBKILX000000000 |
| PA-D6 | SAMN46080954 | JBKILY000000000 |
| PA-E1 | SAMN46080955 | JBKILZ000000000 |
| PA-E2 | SAMN46080956 | JBKIMA000000000 |
| PA-E3 | SAMN46080957 | JBKIMB000000000 |
| PA-E4 | SAMN46080958 | JBKIMC000000000 |
| PA-F1 | SAMN46080959 | JBKIMD000000000 |
| PA-F2 | SAMN46080960 | JBKIME000000000 |
| PA-F3 | SAMN46080961 | JBKIMF000000000 |
| PA-F6 | SAMN46080962 | JBKIMG000000000 |
| PA-G3 | SAMN46080963 | JBKIMH000000000 |
| PA-G4 | SAMN46080964 | nan |
| PA-H1 | SAMN46080965 | JBKIMI000000000 |
| PA-H3 | SAMN46080966 | JBKIMJ000000000 |
| PA-H4 | SAMN46080967 | JBKIMK000000000 |
| PA-H5 | SAMN46080968 | JBKIML000000000 |
| PA-I1 | SAMN46080969 | JBKIMM000000000 |
| JYPA2 | SAMN46080970 | JBKIMN000000000 |
| JYPA11 | SAMN46080971 | JBKIMO000000000 |
| JYPA22 | SAMN46080972 | JBKIMP000000000 |
| JYPA47 | SAMN46080973 | JBKIMQ000000000 |
| JYPA121 | SAMN46080974 | JBKIMR000000000 |
| JYPA156 | SAMN46080975 | JBKIMS000000000 |
| JYPA159 | SAMN46080976 | JBKIMT000000000 |
| JYPA162 | SAMN46080977 | JBKIMU000000000 |
| JYPA187 | SAMN46080978 | JBKIMV000000000 |
| JYPA192 | SAMN46080979 | JBKIMW000000000 |
| JYPA216 | SAMN46080980 | JBKIMX000000000 |
| JYPA283 | SAMN46080981 | JBKIMY000000000 |
| JYPA307 | SAMN46080982 | JBKIMZ000000000 |
| JYPA312 | SAMN46080983 | JBKINA000000000 |
| JYPA345 | SAMN46080984 | JBKINB000000000 |
| JYPA526 | SAMN46080985 | JBKINC000000000 |
| JYPA537 | SAMN46080986 | JBKIND000000000 |
| JYPA545 | SAMN46080987 | JBKINE000000000 |
| JYPA666 | SAMN46080988 | JBKINF000000000 |
| JYPA693 | SAMN46080989 | JBKING000000000 |
| JYPA694 | SAMN46080990 | JBKINH000000000 |
| JYPA708 | SAMN46080991 | JBKINI000000000 |
